# Supplementary material
Source: PubMed Central journal article supplement (PMC4714866)
Supplement: NIHMS721410-supplement-1.pdf [file NIHMS721410-supplement-1.pdf]

**Table 1.** Age adjusted distribution (mean±standard error or n(%)) of potential AMD risk factors among CAREDS participants by healthy lifestyle score.

| Variables                                                   | Healthy Lifestyle Score, Full sample (n=1,663) |       |             | Healthy Lifestyle Score, Diet stable sample (n=728) |             |         |             |         |
|-------------------------------------------------------------|------------------------------------------------|-------|-------------|-----------------------------------------------------|-------------|---------|-------------|---------|
|                                                             | 4 - 6                                          |       | 0 - 2       | P-value                                             | 4 - 6       | 0 - 2   | P-value     |         |
| N                                                           | 769                                            |       | 440         |                                                     | 353         | 196     |             |         |
| <b>Demographics</b>                                         |                                                |       |             |                                                     |             |         |             |         |
| Age group*, %                                               |                                                |       |             | 0.02                                                |             |         | 0.67        |         |
| ≤ 69                                                        | 357                                            | (46%) | 230         | (52%)                                               | 202         | (57%)   | 115         | (59%)   |
| 70-74                                                       | 199                                            | (26%) | 113         | (26%)                                               | 76          | (22%)   | 43          | (22%)   |
| ≥75                                                         | 213                                            | (28%) | 97          | (22%)                                               | 75          | (21%)   | 38          | (19%)   |
| Ethnicity, % white                                          | 746                                            | (97%) | 433         | (99%)                                               | 341         | (97%)   | 192         | (96%)   |
| Education, %                                                |                                                |       |             | <.0001                                              |             |         |             | <.0001  |
| High school                                                 | 125                                            | (16%) | 137         | (30%)                                               | 56          | (16%)   | 57          | (27%)   |
| College                                                     | 356                                            | (47%) | 224         | (51%)                                               | 164         | (46%)   | 104         | (54%)   |
| Postcollege studies                                         | 288                                            | (37%) | 79          | (18%)                                               | 133         | (38%)   | 35          | (17%)   |
| <b>Lifestyle</b>                                            |                                                |       |             |                                                     |             |         |             |         |
| Physical activity, METs/week                                | 23 ± 0.5                                       |       | 5 ± 0.6     | <.0001                                              | 23 ± 1      |         | 6 ± 1       | <.0001  |
| Smoking, pack-years, %                                      |                                                |       |             | <.0001                                              |             |         |             | <.0001  |
| 0                                                           | 592                                            | (77%) | 90          | (21%)                                               | 266         | (76%)   | 32          | (15%)   |
| 0-7                                                         | 157                                            | (20%) | 117         | (25%)                                               | 77          | (22%)   | 55          | (26%)   |
| >7                                                          | 20                                             | (3%)  | 233         | (54%)                                               | 10          | (3%)    | 109         | (56%)   |
| Alcohol, g/day                                              |                                                |       |             | 0.07                                                |             |         |             | 5E-04   |
| 0                                                           | 319                                            | (41%) | 169         | (38%)                                               | 149         | (42%)   | 62          | (29%)   |
| >0 to <4                                                    | 235                                            | (31%) | 118         | (27%)                                               | 106         | (31%)   | 49          | (24%)   |
| ≥ 4                                                         | 215                                            | (28%) | 153         | (35%)                                               | 98          | (27%)   | 85          | (44%)   |
| Total sunlight exposure (last 20 years), Maryland sun-years | 0.83 ± 0.02                                    |       | 0.82 ± 0.02 | 0.75                                                | 0.8 ± 0.02  |         | 0.8 ± 0.03  | 0.94    |
| <b>Ocular factors</b>                                       |                                                |       |             |                                                     |             |         |             |         |
| Macular pigment density                                     | 0.38 ± 0.01                                    |       | 0.34 ± 0.01 | 0.002                                               | 0.40 ± 0.01 |         | 0.36 ± 0.02 | 0.05    |
| AMD                                                         |                                                |       |             |                                                     |             |         |             |         |
| Early, %                                                    | 138                                            | (17%) | 83          | (21%)                                               | 53          | (15.0%) | 37          | (19.4%) |
| Large drusen, %                                             | 111                                            | (15%) | 63          | (17%)                                               | 43          | (12.5%) | 27          | (14.7%) |

|                                                |             |        |             |        |        |             |         |             |         |        |
|------------------------------------------------|-------------|--------|-------------|--------|--------|-------------|---------|-------------|---------|--------|
| Pigmentary abnormalities, %                    | 59          | (8%)   | 47          | (13%)  | 0.04   | 23          | (7.37%) | 20          | (11.7%) | 0.09   |
| Advanced AMD, %                                | 11          | (1.3%) | 12          | (3.1%) | 0.06   | 2           | (0.51%) | 2           | (1.23%) | 0.52   |
| Early or Advanced AMD, %                       | 149         | (19%)  | 95          | (23%)  | 0.13   | 55          | (15.5%) | 39          | (20.3%) | 0.14   |
| Medical factors                                |             |        |             |        |        |             |         |             |         |        |
| Body Mass Index (BMI), kg/m <sup>2</sup>       | 26 ± 0.2    |        | 29 ± 0.3    |        | <.0001 | 25.7 ± 0.3  |         | 28.5 ± 0.4  |         | <.0001 |
| Hormone therapy, %                             |             |        |             |        | 0.16   |             |         |             |         | 1.00   |
| Never                                          | 253         | (32%)  | 147         | (34%)  |        | 121         | (34%)   | 63          | (30%)   |        |
| Past                                           | 91          | (12%)  | 66          | (15%)  |        | 43          | (12%)   | 29          | (14%)   |        |
| Current                                        | 425         | (56%)  | 227         | (51%)  |        | 189         | (54%)   | 104         | (53%)   |        |
| Diet                                           |             |        |             |        |        |             |         |             |         |        |
| Modified Healthy Eating Index - 2005           | 68 ± 0.2    |        | 60 ± 0.3    |        | <.0001 | 68.0 ± 0.3  |         | 59.7 ± 0.4  |         | <.0001 |
| Lutein and Zeaxanthin, mcg/day                 | 2723 ± 60   |        | 1712 ± 80   |        | <.0001 | 2759 ± 94   |         | 1614 ± 126  |         | <.0001 |
| Total omega-3 fatty acids, g/day               | 1.2 ± 0.02  |        | 1.4 ± 0.03  |        | <.0001 | 1.19 ± 0.04 |         | 1.38 ± 0.05 |         | 0.002  |
| Fruit intake, servings/day                     | 2.6 ± 0.05  |        | 1.6 ± 0.1   |        | <.0001 | 2.6 ± 0.1   |         | 1.6 ± 0.1   |         | <.0001 |
| Vegetable intake, servings/day                 | 3.0 ± 0.1   |        | 2.0 ± 0.1   |        | <.0001 | 3.0 ± 0.1   |         | 1.8 ± 0.1   |         | <.0001 |
| β-Carotene, µg/day                             | 5282 ± 115  |        | 3346 ± 153  |        | <.0001 | 5305 ± 166  |         | 3051 ± 223  |         | <.0001 |
| Vitamin C, mg/day                              | 137 ± 2     |        | 93 ± 3      |        | <.0001 | 135 ± 3     |         | 93 ± 5      |         | <.0001 |
| Vitamin D, mcg/day                             | 6.4 ± 0.1   |        | 5.1 ± 0.2   |        | <.0001 | 6.2 ± 0.2   |         | 4.9 ± 0.3   |         | 3E-04  |
| Vitamin E, mg/day                              | 8.8 ± 0.2   |        | 7.9 ± 0.2   |        | 0.001  | 8.7 ± 0.2   |         | 7.7 ± 0.3   |         | 0.01   |
| Zinc, mg/day                                   | 12 ± 0.2    |        | 10 ± 0.2    |        | <.0001 | 12.1 ± 0.3  |         | 9.8 ± 0.4   |         | <.0001 |
| Supplement use                                 |             |        |             |        |        |             |         |             |         |        |
| Multivitamin, %                                | 351         | (45%)  | 179         | (41%)  | 0.13   | 168         | (47%)   | 92          | (45%)   | 0.94   |
| Lutein or lutein + zeaxanthin <sup>†</sup> , % | 17          | (2.1%) | 13          | (3.4%) | 0.31   | 5           | (1%)    | 5           | (2%)    | 0.30   |
| Serum values                                   |             |        |             |        |        |             |         |             |         |        |
| Lutein + zeaxanthin (trans), µmol/L            | 0.35 ± 0.01 |        | 0.27 ± 0.01 |        | <.0001 | 0.36 ± 0.01 |         | 0.28 ± 0.01 |         | <.0001 |
| Genes                                          |             |        |             |        |        |             |         |             |         |        |
| CFH Y402H (rs1061170)                          |             |        |             |        | 0.19   |             |         |             |         | 0.29   |
| TT                                             | 294         | (38%)  | 156         | (36%)  |        | 138         | (39%)   | 64          | (33%)   |        |
| TC                                             | 360         | (47%)  | 209         | (47%)  |        | 156         | (45%)   | 101         | (49%)   |        |
| CC                                             | 115         | (15%)  | 75          | (17%)  |        | 58          | (16%)   | 31          | (15%)   |        |
| ARMS2 (rs10490924)                             |             |        |             |        | 0.42   |             |         |             |         | 0.63   |
| CC                                             | 465         | (60%)  | 254         | (58%)  |        | 219         | (63%)   | 115         | (58%)   |        |
| AC                                             | 266         | (35%)  | 167         | (38%)  |        | 117         | (33%)   | 77          | (38%)   |        |
| AA                                             | 36          | (5%)   | 18          | (4%)   |        | 15          | (4%)    | 3           | (1%)    |        |
| CFI (rs10033900)                               |             |        |             |        | 0.53   |             |         |             |         | 0.39   |

|                          |     |       |     |       |      |     |       |     |       |      |
|--------------------------|-----|-------|-----|-------|------|-----|-------|-----|-------|------|
| GG                       | 208 | (27%) | 114 | (25%) |      | 99  | (29%) | 51  | (25%) |      |
| GA                       | 378 | (49%) | 215 | (49%) |      | 175 | (49%) | 95  | (46%) |      |
| AA                       | 182 | (24%) | 111 | (26%) |      | 78  | (22%) | 50  | (26%) |      |
| <i>CFB/C2</i> (rs641153) |     |       |     |       | 0.53 |     |       |     |       | 0.24 |
| AA/AG                    | 123 | (16%) | 76  | (18%) |      | 51  | (15%) | 36  | (20%) |      |
| GG                       | 646 | (84%) | 364 | (82%) |      | 301 | (85%) | 160 | (78%) |      |
| <i>C3</i> (rs2230199)    |     |       |     |       | 0.87 |     |       |     |       | 0.23 |
| CC                       | 34  | (4%)  | 16  | (4%)  |      | 15  | (5%)  | 9   | (4%)  |      |
| GC                       | 244 | (32%) | 143 | (32%) |      | 119 | (34%) | 55  | (29%) |      |
| GG                       | 490 | (64%) | 281 | (64%) |      | 218 | (62%) | 132 | (64%) |      |

\* Not age adjusted.

† Use of single lutein, or lutein and zeaxanthin, supplements of dose  $\geq 1$  mg/day for  $\geq 2$  years.
