# Supplementary material
Source: PubMed Central journal article supplement (PMC4714866)
Supplement: NIHMS721410-supplement-2.pdf [file NIHMS721410-supplement-2.pdf]

**Table 4a.** Joint Effects of AMD Genotype (based on *CFH* or *ARMS2*) and Dietary Lutein and Zeaxanthin (LZ) Intake in Association with Odds for AMD in overall sample

| Genotype                  | No. with AMD/Total No. in Group | High LZ Intake<br>≥2000 mcg/day<br>(n=827)<br>OR* (95% CI) | Low LZ Intake<br><2000 mcg/day<br>(n=836)<br>OR* (95% CI) | P-value for trend | P-value for Multiplicative Interaction | Synergy Index (95% CI) |
|---------------------------|---------------------------------|------------------------------------------------------------|-----------------------------------------------------------|-------------------|----------------------------------------|------------------------|
| <i>CFH</i> (rs1061170)    |                                 |                                                            |                                                           |                   |                                        |                        |
| TT                        | 92/606                          | 1 [Reference]                                              | 1.10 (0.70, 1.72)                                         | 0.7               |                                        | 1.08                   |
| TC                        | 163/791                         | 1.46 (0.98, 2.19)                                          | 1.42 (0.95, 2.13)                                         | 0.83              | 0.91                                   | (0.55, 2.11)           |
| CC                        | 82/266                          | 2.34 (1.41, 3.87)                                          | 2.71 (1.66, 4.41)                                         | 0.39              |                                        |                        |
| <i>ARMS2</i> (rs10490924) |                                 |                                                            |                                                           |                   |                                        |                        |
| CC                        | 179/1017                        | 1 [Reference]                                              | 0.96 (0.69, 1.33)                                         | 0.81              |                                        | 1.44                   |
| AC/AA                     | 158/643                         | 1.44 (1.01, 2.04)                                          | 1.65 (1.17, 2.32)                                         | 0.49              | 0.47                                   | (0.67, 3.12)           |
| <i>ARMS2</i> (rs10490924) |                                 |                                                            |                                                           |                   |                                        |                        |
| CC                        | 179/1017                        | 1 [Reference]                                              | 0.96 (0.69, 1.33)                                         | 0.81              |                                        | 1.22                   |
| AC                        | 136/575                         | 1.32 (0.91, 1.91)                                          | 1.63 (1.15, 2.32)                                         | 0.29              | 0.72                                   | (0.53, 2.82)           |
| AA                        | 22/68                           | 2.48 (1.18, 5.24)                                          | 1.79 (0.79, 4.06)                                         | 0.46              |                                        |                        |
| <i>CFB/C2</i> (rs641153)  |                                 |                                                            |                                                           |                   |                                        |                        |
| AA/AG                     | 44/278                          | 1 [Reference]                                              | 0.69 (0.36, 1.35)                                         | 0.24              |                                        | 1.85                   |
| GG                        | 293/1385                        | 1.21 (0.75, 1.95)                                          | 1.37 (0.85, 2.20)                                         | 0.35              | 0.18                                   | (1.03, 3.33)           |
| <i>CFI</i> (rs10033900)   |                                 |                                                            |                                                           |                   |                                        |                        |
| GG                        | 92/430                          | 1 [Reference]                                              | 1.58 (0.97, 2.55)                                         | 0.05              |                                        | 0.12                   |
| GA                        | 148/835                         | 1.13 (0.72, 1.75)                                          | 0.96 (0.61, 1.51)                                         | 0.37              | 0.16                                   | (2.7E-5, 535.7)        |
| AA                        | 97/397                          | 1.55 (0.95, 2.55)                                          | 1.56 (0.95, 2.56)                                         | 0.95              |                                        |                        |
| <i>C3</i> (rs2230199)     |                                 |                                                            |                                                           |                   |                                        |                        |
| CC                        | 17/69                           | 1 [Reference]                                              | 2.39 (0.72, 7.91)                                         | 0.15              |                                        | 0.13                   |
| GC                        | 105/540                         | 1.30 (0.47, 3.60)                                          | 1.34 (0.48, 3.73)                                         | 0.79              | 0.34                                   | (1.9E-4, 89.0)         |
| GG                        | 214/1053                        | 1.34 (0.49, 3.61)                                          | 1.35 (0.50, 3.66)                                         | 0.95              |                                        |                        |

\* Adjusted for age (further adjustment for eye color, smoking, and hormone therapy did not alter ORs)

**Table 4b.** Joint Effects of AMD Genotype and Dietary Lutein and Zeaxanthin (LZ) Intake in Association with Odds for AMD among diet stable individuals

| Genotype                  | No. with AMD/Total No. in Group | High LZ Intake                        | Low LZ Intake                         | P-value for trend | P-value for Multiplicative Interaction | Synergy Index (95% CI) |
|---------------------------|---------------------------------|---------------------------------------|---------------------------------------|-------------------|----------------------------------------|------------------------|
|                           |                                 | ≥2000 mcg/day (n=358)<br>OR* (95% CI) | <2000 mcg/day (n=370)<br>OR* (95% CI) |                   |                                        |                        |
| <i>CFH</i> (rs1061170)    |                                 |                                       |                                       |                   |                                        |                        |
| TT                        | 34/275                          | 1 [Reference]                         | 1.59 (0.76, 3.31)                     | 0.22              | 0.63                                   | 1.49                   |
| TC                        | 58/339                          | 1.95 (0.98, 3.89)                     | 1.78 (0.90, 3.54)                     | 0.74              |                                        | (0.65, 3.42)           |
| CC                        | 28/114                          | 1.81 (0.74, 4.42)                     | 4.37 (1.97, 9.68)                     | 0.06              |                                        |                        |
| <i>ARMS2</i> (rs10490924) |                                 |                                       |                                       |                   |                                        |                        |
| CC                        | 70/457                          | 1 [Reference]                         | 1.51 (0.90, 2.54)                     | 0.11              | 0.39                                   | 0.27                   |
| AC/AA                     | 50/269                          | 1.57 (0.86, 2.87)                     | 1.67 (0.94, 2.96)                     | 0.9               |                                        | (3.3E-4, 222.8)        |
| <i>CFB/C2</i> (rs641153)  |                                 |                                       |                                       |                   |                                        |                        |
| AA/AG                     | 12/116                          | 1 [Reference]                         | 1.55 (0.46, 5.29)                     | 0.57              | 0.78                                   | 0.98                   |
| GG                        | 108/612                         | 2.14 (0.80, 5.71)                     | 2.77 (1.05, 7.33)                     | 0.23              |                                        | (0.15, 6.32)           |
| <i>CFI</i> (rs10033900)   |                                 |                                       |                                       |                   |                                        |                        |
| GG                        | 34/199                          | 1 [Reference]                         | 1.54 (0.73, 3.27)                     | 0.25              | 0.37                                   | 0.52                   |
| GA                        | 47/361                          | 0.73 (0.35, 1.52)                     | 1.09 (0.55, 2.17)                     | 0.2               |                                        | (0.08, 3.65)           |
| AA                        | 39/168                          | 1.83 (0.85, 3.94)                     | 1.74 (0.82, 3.68)                     | 0.94              |                                        |                        |
| <i>C3</i> (rs2230199)     |                                 |                                       |                                       |                   |                                        |                        |
| CC                        | 29-Sep                          | 1 [Reference]                         | 3.60 (0.59, 22.05)                    | 0.17              | 0.97                                   | 1.01                   |
| GC                        | 32/237                          | 0.97 (0.19, 4.85)                     | 0.80 (0.16, 4.03)                     | 0.68              |                                        | (0.02, 57.10)          |
| GG                        | 79/462                          | 0.91 (0.19, 4.37)                     | 1.33 (0.28, 6.36)                     | 0.14              |                                        |                        |

\* Adjusted for age (further adjustment for eye color, smoking, and hormone therapy did not alter ORs)
