# Supplementary material
Source: PubMed Central journal article supplement (PMC4714866)
Supplement: NIHMS721410-supplement-3.pdf [file NIHMS721410-supplement-3.pdf]

**Table 5a.** Joint Effects of Complement Pathway Genotype (*CFB/C2*, *CFI*, and *C3*) and Healthy Lifestyle Score in Association with Odds for AMD in overall sample

| Genotype                 | No. with AMD/Total No. in Group | Most Healthy Lifestyles     | 3 (n=454)         | Least Healthy Lifestyle     | P-value† | P-value for Multiplicative Interaction | Synergy Index (95% CI)    |
|--------------------------|---------------------------------|-----------------------------|-------------------|-----------------------------|----------|----------------------------------------|---------------------------|
|                          |                                 | 4-6 (n=769)<br>OR* (95% CI) | OR* (95% CI)      | 0-2 (n=440)<br>OR* (95% CI) |          |                                        |                           |
| <i>CFB/C2</i> (rs641153) |                                 |                             |                   |                             |          |                                        |                           |
| AA/AG                    | 44/278                          | 1 [Reference]               | 0.87 (0.40, 1.89) | 0.84 (0.37, 1.93)           | 0.57     | 0.28                                   | 1.33<br>(1.11, 1.60)      |
| GG                       | 293/1385                        | 1.24 (0.74, 2.06)           | 1.47 (0.86, 2.51) | 1.66 (0.97, 2.83)           | 0.06     |                                        |                           |
| <i>CFI</i> (rs10033900)  |                                 |                             |                   |                             |          |                                        |                           |
| GG                       | 92/430                          | 1 [Reference]               | 1.64 (0.93, 2.90) | 1.41 (0.79, 2.52)           | 0.11     | 0.61                                   | 1.29<br>(0.78, 2.13)      |
| GA                       | 148/835                         | 1.01 (0.65, 1.58)           | 1.11 (0.69, 1.81) | 0.91 (0.54, 1.52)           | 0.7      |                                        |                           |
| AA                       | 97/397                          | 1.33 (0.80, 2.19)           | 1.06 (0.57, 1.98) | 2.43 (1.41, 4.19)           | 0.05     |                                        |                           |
| <i>C3</i> (rs2230199)    |                                 |                             |                   |                             |          |                                        |                           |
| CC                       | 17/69                           | 1 [Reference]               | 1.37 (0.31, 6.05) | 6.02 (1.51, 24.05)          | 0.01     | 0.78                                   | 0.22<br>(8.7E-13, 5.7E10) |
| GC                       | 105/540                         | 1.58 (0.58, 4.35)           | 1.27 (0.44, 3.63) | 1.42 (0.50, 4.08)           | 0.66     |                                        |                           |
| GG                       | 214/1053                        | 1.26 (0.47, 3.39)           | 1.69 (0.62, 4.60) | 1.68 (0.62, 4.59)           | 0.11     |                                        |                           |

\* Adjusted for age (further adjustment for eye color and hormone therapy, or dietary LZ intake, did not alter ORs)

† P-values are for trend across lifestyle score group, within each genotype class.

**Table 5b.** Joint Effects of Complement Pathway Genotype (*CFB/C2*, *CFI*, and *C3*) and Healthy Lifestyle Score in Association with Odds for AMD among diet stable individuals

| Genotype                 | No. with AMD/Total No. in Group | Most Healthy Lifestyles     | 3 (n=179)          | Least Healthy Lifestyle     | P-value† | P-value for Multiplicative Interaction | Synergy Index (95% CI) |
|--------------------------|---------------------------------|-----------------------------|--------------------|-----------------------------|----------|----------------------------------------|------------------------|
|                          |                                 | 4-6 (n=353)<br>OR* (95% CI) | OR* (95% CI)       | 0-2 (n=196)<br>OR* (95% CI) |          |                                        |                        |
| <i>CFB/C2</i> (rs641153) |                                 |                             |                    |                             |          |                                        |                        |
| AA/AG                    | 12/116                          | 1 [Reference]               | 1.08 (0.24, 4.94)  | 1.38 (0.34, 5.63)           | 0.76     | 0.99                                   | 1.16<br>(0.48, 2.81)   |
| GG                       | 108/612                         | 2.00 (0.75, 5.37)           | 1.86 (0.66, 5.25)  | 2.86 (1.04, 7.84)           | 0.19     |                                        |                        |
| <i>CFI</i> (rs10033900)  |                                 |                             |                    |                             |          |                                        |                        |
| GG                       | 34/199                          | 1 [Reference]               | 1.03 (0.40, 2.61)  | 1.13 (0.46, 2.77)           | 0.78     | 0.18                                   | 1.43<br>(1.14, 1.80)   |
| GA                       | 47/361                          | 0.73 (0.37, 1.47)           | 0.83 (0.37, 1.83)  | 0.73 (0.33, 1.65)           | 0.96     |                                        |                        |
| AA                       | 39/168                          | 1.22 (0.57, 2.63)           | 0.71 (0.24, 2.10)  | 2.90 (1.31, 6.41)           | 0.05     |                                        |                        |
| <i>C3</i> (rs2230199)    |                                 |                             |                    |                             |          |                                        |                        |
| CC                       | 29-Sep                          | 1 [Reference]               | 0.86 (0.07, 11.11) | 4.72 (0.75, 29.65)          | 0.10     | 0.95                                   | 1.08<br>(0.01, 169.2)  |
| GC                       | 32/237                          | 0.85 (0.22, 3.31)           | 0.36 (0.08, 1.74)  | 0.65 (0.14, 2.92)           | 0.40     |                                        |                        |
| GG                       | 79/462                          | 0.69 (0.18, 2.59)           | 0.90 (0.23, 3.54)  | 1.07 (0.28, 4.09)           | 0.13     |                                        |                        |

\* Adjusted for age (further adjustment for eye color and hormone therapy, or dietary LZ intake, did not alter ORs)

† P-values are for trend across lifestyle score group, within each genotype class.
